# Supplementary material
Source: PubMed Central journal article supplement (PMC2042190)

Percentage of HLA-A alleles

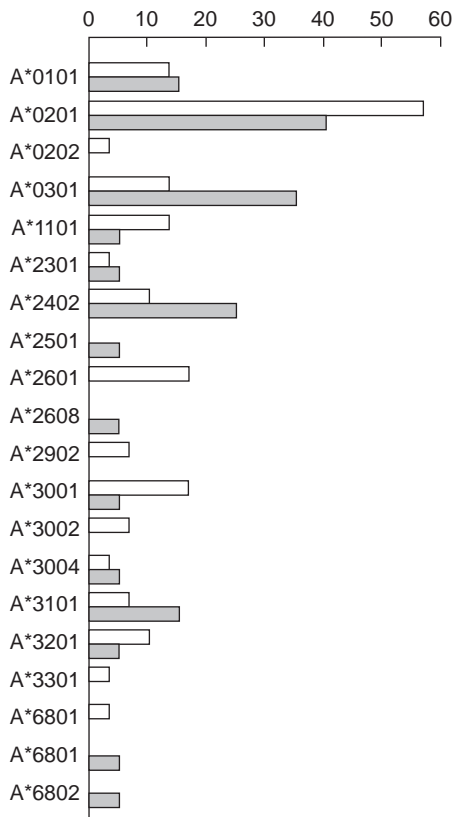

□ Patients with "Only Effector" Responses (n=30)  
 ■ Patients with Polyfunctional Responses (n=20)

Percentage of HLA-B alleles

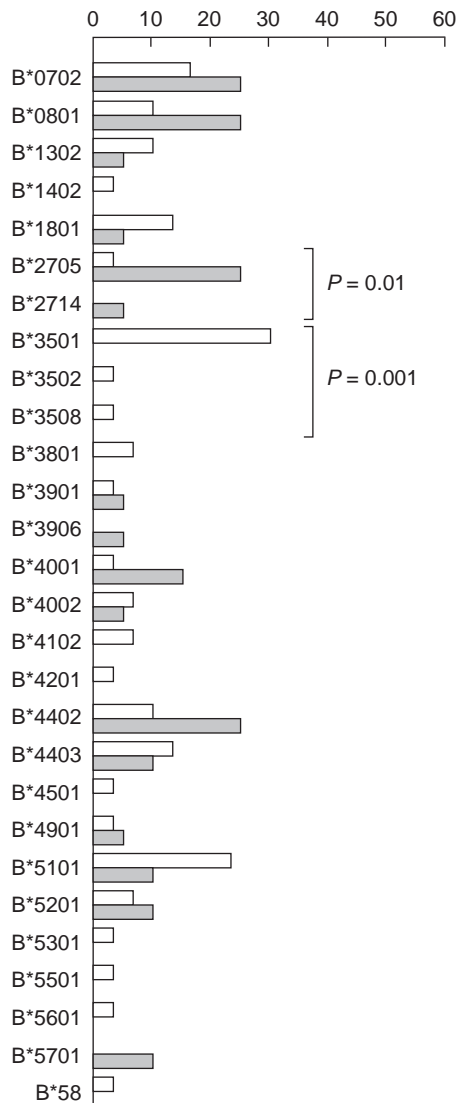

Supplement: pnas_0707570104_2.pdf [file pnas_0707570104_2.pdf]
