# Supplementary material
Source: PubMed Central journal article supplement (PMC2042190)
Supplement: pnas_0707570104_3.pdf [file pnas_0707570104_3.pdf]

## SI Table 1

### Peptide sequence, location and HLA-restriction of the 32 gag-specific peptides described in the study

| Peptide     | Location    | HLA restriction        |
|-------------|-------------|------------------------|
| GELDRWEKI   | Gag 11-19   | B*4001, B*4002         |
| KIRLRPGGK   | Gag 18-26   | A*0301                 |
| IRLRPGGKK   | Gag 19-27   | B*2705                 |
| RLRPGGKKK   | Gag 20-28   | A*0301, A*3001         |
| GGKKKYKLLK  | Gag 24-32   | B*0801                 |
| KYKLVHIVW   | Gag 28-36   | A*2402                 |
| WASRELERF   | Gag 36-44   | B*3501                 |
| ELRSLYNTV   | Gag 74-82   | B*0801                 |
| RSLYNTVATLY | Gag 76-86   | A*3001, A*3002         |
| SLYNTVATL   | Gag 77-85   | A*0201                 |
| QAISPRTLNAW | Gag 145-155 | A*2501                 |
| ISPRTLNAW   | Gag 147-155 | B*5701                 |
| TLNAWVKVV   | Gag 151-159 | A*0201                 |
| KAFSPEVIPMF | Gag 162-172 | B*5701                 |
| EVIPMFSAL   | Gag 167-175 | A*2601                 |
| TPQDLNTML   | Gag 180-188 | B*0702, B*4201         |
| GHQAAMQML   | Gag 193-201 | A*0201, B*3801, B*3901 |
| AEWDRVHPV   | Gag 210-218 | B*4002                 |
| HPVHAGPIA   | Gag 216-224 | B*0702                 |
| NPVPVGNII   | Gag 255-263 | B*3501                 |
| EIYKRWII    | Gag 260-267 | B*0801                 |
| RMYSPTSI    | Gag 275-282 | B*5201                 |
| RDYVDRFFKTL | Gag 294-304 | B*4403                 |
| YVDRFYKTL   | Gag 296-304 | A*0201                 |
| AEQASQDVKNW | Gag 306-316 | B*4402                 |
| QASQEVKNW   | Gag 308-316 | B*5301, B*5701         |
| DCKTILKAL   | Gag 329-337 | B*0801                 |
| ACQGVGGPGHK | Gag 349-359 | A*1101                 |
| GPGHKARVL   | Gag 355-363 | B*0702                 |
| TERQANFL    | Gag 427-434 | B*4002                 |
| FLGKIWPSYK  | Gag 433-442 | A*0201                 |
| KELYPLTSL   | Gag 481-489 | B*4002                 |

Hla restrictions were based on the Los Alamos Database and on the HLA class I genotyping of the patients.
