# Supplementary material
Source: PubMed Central journal article supplement (PMC2042190)
Supplement: pnas_0707570104_4.pdf [file pnas_0707570104_4.pdf]

## SI Table 2

**Total number of responses and frequencies including the frequency of polyfunctional responses induced by the 39 gag-specific peptide-HLA associations described in the study.**

| <b>Gag epitope</b> | <b>Number of responses<br/>(polyfunctional<br/>responses)</b> | <b>Frequency %</b> |
|--------------------|---------------------------------------------------------------|--------------------|
| A*0201-FLGKIWPSYK  | 12 (4)                                                        | 14.63              |
| A*0201-GHQAAMQML   | 2                                                             | 2.44               |
| A*0201-TLNAWVKVV   | 1                                                             | 1.22               |
| A*0201-SLYNTVATL   | 6 (1)                                                         | 7.32               |
| A*0201-YVDRFYKTL   | 3 (1)                                                         | 3.66               |
| A*0301-KIRLRPGGK   | 1                                                             | 1.22               |
| A*0301-RLRPGGKKK   | 6 (2)                                                         | 7.32               |
| A*1101-ACQGVGGPGHK | 1                                                             | 1.22               |
| A*2402-KYCLKHIVW   | 1                                                             | 1.22               |
| A*2501-QAISPRTLNAW | 1                                                             | 1.22               |
| A*2601-EVIPMFSAL   | 3                                                             | 3.66               |
| A*3001-RLRPGGKKK   | 1 (1)                                                         | 1.22               |
| A*3001-RSLYNTVATLY | 2                                                             | 2.44               |
| A*3002-RSLYNTVATLY | 2                                                             | 2.44               |
| B*0702-GPGHKARVL   | 3 (2)                                                         | 3.66               |
| B*0702-HPVHAGPIA   | 3                                                             | 3.66               |
| B*0702-TPQDLNTML   | 1 (1)                                                         | 1.22               |
| B*0801-DCKTILKAL   | 2                                                             | 2.44               |
| B*0801-EIYKRWII    | 3 (3)                                                         | 3.66               |
| B*0801-ELRSLYNTV   | 1 (1)                                                         | 1.22               |
| B*0801-GGKKKYKLLK  | 2 (1)                                                         | 2.44               |
| B*2705-IRLRPGGK    | 2 (2)                                                         | 2.44               |
| B*3501-NPVPVGNII   | 1                                                             | 1.22               |
| B*3501-WASRELERF   | 1                                                             | 1.22               |
| B*3801-GHQAAMQML   | 2                                                             | 2.44               |
| B*3901-GHQAAMQML   | 1                                                             | 1.22               |
| B*4001-GELDRWEKI   | 1 (1)                                                         | 1.22               |
| B*4002-AEWDRVHPV   | 1                                                             | 1.22               |
| B*4002-GELDRWEKI   | 1 (1)                                                         | 1.22               |
| B*4002-KELYPLTSL   | 1                                                             | 1.22               |
| B*4002-TERQANFL    | 2 (1)                                                         | 2.44               |
| B*4201-TPQDLNTML   | 1                                                             | 1.22               |
| B*4402-AEQASQDVKNW | 1                                                             | 1.22               |
| B*4403-RDYVDRFFKTL | 1                                                             | 1.22               |
| B*5201-RMYSPTSI    | 3 (1)                                                         | 3.66               |
| B*5301-QASQEVKNW   | 1                                                             | 1.22               |
| B*5701-KAFSPEVIPMF | 2 (1)                                                         | 2.44               |
| B*5701-ISPRTLNAW   | 2 (2)                                                         | 2.44               |
| B*5701-QASQEVKNW   | 1 (1)                                                         | 1.22               |
