# Supplementary material
Source: PubMed Central journal article supplement (PMC2042190)
Supplement: pnas_0707570104_5.pdf [file pnas_0707570104_5.pdf]

SI Table 3

Class I HLA genotype of the patients and of the HLA-matched and mismatched BCL used to confirm the peptide-HLA associations shown in Fig. 2C.

| Peptide-HLA association | Class I HLA alleles of the responders |               |               |               |         |         | Class I HLA alleles of the mismatched BCL |        |        |        |         |         | Class I HLA alleles of the matched BCL |               |               |               |         |         |
|-------------------------|---------------------------------------|---------------|---------------|---------------|---------|---------|-------------------------------------------|--------|--------|--------|---------|---------|----------------------------------------|---------------|---------------|---------------|---------|---------|
| HLA-A*0201-SLYNTVATL    | <b>A*0201</b>                         | A*6802        | B*5101        | B*4901        | CW*0202 | CW*0701 | A*3101                                    | A*3301 | B*1402 | B*4402 | CW*0501 | CW*0802 | <b>A*0201</b>                          |               | B*4402        | CW*0401       | CW*0501 |         |
| HLA-A*0201-FLGKIWPSYK   | <b>A*0201</b>                         | A*2402        | B*0801        | B*1801        | CW*0701 |         | A*3101                                    | A*3301 | B*1402 | B*4402 | CW*0501 | CW*0802 | <b>A*0201</b>                          |               | B*4402        | CW*0401       | CW*0501 |         |
| HLA-A*2402-KYKLVKLVW    | <b>A*2402</b>                         |               | B*5101        | B*1801        | CW*1203 | CW*1602 | A*0201                                    |        | B*4402 |        | CW*0401 | CW*0501 | A*0101                                 | <b>A*2402</b> | B*5201        | B*2705        | CW*0102 | CW*1202 |
| HLA-A*2601-EVIPMFSAL    | A*0101                                | <b>A*2601</b> | B*3501        | B*3801        | CW*0401 | CW*1203 | A*0201                                    |        | B*4402 |        | CW*0401 | CW*0501 | A*0201                                 | <b>A*2601</b> | B*4102        | B*5501        | CW*0303 | CW*1701 |
| HLA-A*3001-RLRPGGKKK    | A*0201                                | <b>A*3001</b> | B*1302        | B*4403        | CW*0602 | CW*1601 | A*0201                                    |        | B*4402 |        | CW*0401 | CW*0501 | A*0101                                 | <b>A*3001</b> | B*1302        | B*0801        | CW*0602 | CW*0701 |
| HLA-A*0301-RLRPGGKKK    | <b>A*0301</b>                         | A*2402        | B*2705        | B*5701        | CW*0202 | CW*0602 | A*0201                                    |        | B*4402 |        | CW*0401 | CW*0501 | <b>A*0301</b>                          |               | B*0702        | B*3901        | CW*0702 | CW*1203 |
| HLA-B*0702-TPQDLNTML    | A*0301                                |               | <b>B*0702</b> | B*3901        | CW*0702 | CW*1203 | A*0301                                    | A*3101 | B*0801 | B*2705 | CW*0102 | CW*0701 | A*0301                                 |               | B*2714        | <b>B*0702</b> | CW*0102 | CW*0702 |
| HLA-B*0702-GPGHKARVL    | A*0301                                |               | <b>B*0701</b> | B*4001        |         |         | A*0201                                    |        | B*4402 |        | CW*0401 | CW*0501 | A*0201                                 | A*0301        | <b>B*0701</b> | B*4402        | CW*0501 | CW*0702 |
| HLA-B*0801-GGKKKYKLV    | A*0201                                | A*3004        | <b>B*0801</b> | B*4402        | CW*0701 | CW*0704 | A*0101                                    | A*2402 | B*5201 | B*2705 | CW*0102 | CW*1202 | A*0101                                 | A*3001        | B*1302        | <b>B*0801</b> | CW*0602 | CW*0701 |
| HLA-B*0801-DCKTILKAL    | A*0201                                | A*2402        | <b>B*0801</b> | B*1801        | CW*0701 |         | A*0301                                    | A*2402 | B*2705 | B*5701 | CW*0202 | CW*0602 | A*0101                                 | A*3001        | B*1302        | <b>B*0801</b> | CW*0602 | CW*0701 |
| HLA-B*0801-EIYKRWII     | A*2402                                | A*2501        | <b>B*0801</b> | B*1801        | CW*0701 | CW*1203 | A*0301                                    | A*2402 | B*2705 | B*5701 | CW*0202 | CW*0602 | A*0101                                 | A*3001        | B*1302        | <b>B*0801</b> | CW*0602 | CW*0701 |
| HLA-B*4002-AEWDRVHPV    | A*2608                                | A*3101        | <b>B*4002</b> | B*4402        | CW*0202 | CW*0501 | A*3201                                    | A*6801 | B*2705 | B*4402 | CW*0102 | CW*0501 | A*0201                                 | A*2402        | B*1801        | <b>B*4002</b> | CW*0304 | CW*0701 |
| HLA-B*4002-TERQANFL     | A*2301                                | A*3201        | <b>B*4002</b> | B*5703        | CW*0202 | CW*0701 | A*3201                                    | A*6801 | B*2705 | B*4402 | CW*0102 | CW*0501 | A*0201                                 | A*2402        | B*1801        | <b>B*4002</b> | CW*0304 | CW*0701 |
| HLA-B*4002-GELDRWEKI    | A*2301                                | A*3201        | <b>B*4002</b> | B*5703        | CW*0202 | CW*0701 | A*3201                                    | A*6801 | B*2705 | B*4402 | CW*0102 | CW*0501 | A*0201                                 | A*2402        | B*1801        | <b>B*4002</b> | CW*0304 | CW*0701 |
| HLA-B*5701-ISPRTLNAW    | A*0101                                | A*2402        | B*0801        | <b>B*5701</b> | CW*0602 | CW*0701 | A*0201                                    | A*1101 | B*5101 | B*5201 | CW*1202 | CW*1502 | A*0301                                 | A*2402        | B*2705        | <b>B*5701</b> | CW*0202 | CW*0602 |
| HLA-B*5701-KAFSPEVIPMF  | A*0101                                | A*2402        | B*0801        | <b>B*5701</b> | CW*0602 | CW*0701 | A*0201                                    | A*1101 | B*5101 | B*5201 | CW*1202 | CW*1502 | A*0301                                 | A*2402        | B*2705        | <b>B*5701</b> | CW*0202 | CW*0602 |

All epitopes are optimal for the relevant HLA Class I allele according to Frahm *et al* (1). The relevant HLA class I alleles are highlighted in bold.

1) Frahm N, Brander C (2005) HIV Molecular Immunology Database. Available at [www.hiv.lanl.gov/content/immunology/index.html](http://www.hiv.lanl.gov/content/immunology/index.html).
