# Supplementary material
Source: PubMed Central journal article supplement (PMC2042190)
Supplement: pnas_0707570104_6.pdf [file pnas_0707570104_6.pdf]

**SI Table 4**

**CMV-, EBV- and Flu-derived peptides used to determine the functional profile of IL-2 and IFN- $\gamma$  virus-specific CD8 T-cell responses in the HIV-negative healthy subjects.**

| <b>Virus</b> | <b>Peptide</b>  | <b>Location</b>   | <b>HLA restriction</b> |
|--------------|-----------------|-------------------|------------------------|
| CMV          | YSEHPTFTSQY     | pp65 (363-373)    | A*0101                 |
| CMV          | NLVPMVATV       | pp65 (495-503)    | A2                     |
| CMV          | TTVYPPSSTAK     | pp150 (945-955)   | A3                     |
| CMV          | GPISGHVLK       | pp65 (16-24)      | A*1101                 |
| CMV          | PTFTSQYRIQGKL   | pp65 (367-379)    | A24                    |
| CMV          | RKTPrVTGGGAMAGA | pp65 (415-429)    | B7                     |
| CMV          | FPTKDVAL        | pp65 (188-195)    | B*3502                 |
| CMV          | QEFFWDANDIYRIFA | pp65 (511-525)    | B44                    |
| EBV          | GLCTLVAML       | BMLF1 (259-267)   | A2                     |
| EBV          | RVRAYTYSK       | BRLF1 (148-156)   | A3                     |
| EBV          | RLRAEAQVK       | EBNA 3A (603-611) | A3                     |
| EBV          | IVTDFSVIK       | EBNA3B (416-424)  | A11                    |
| EBV          | ATIGTAMYK       | BRLF1 (134-143)   | A11                    |
| EBV          | DYCNVLNKEF      | BRLF1 (28-37)     | A24                    |
| EBV          | RPIFIRRL        | EBNA 3A (379-387) | B7                     |
| EBV          | QAKWRLQTL       | EBNA 3A (158-166) | B8                     |
| EBV          | FLRGRAYGL       | EBNA 3A (325-333) | B8                     |
| EBV          | RAKFKQLL        | BZLF1 (190-197)   | B8                     |
| EBV          | RRIDYDLIEL      | EBNA 3C (258-266) | B27                    |
| EBV          | YPLHEQHGM       | EBNA 3A (458-466) | B35                    |
| EBV          | EENLLDFVRF      | EBNA 3C (281-290) | B44                    |
| FLU          | VSDGGPNLY       | PB1 (591-599)     | A1                     |
| FLU          | CTELKLSDY       | NP (44-52)        | A1                     |
| FLU          | GILGFVFTL       | Matrix 1 (58-66)  | A2                     |
| FLU          | ILRGSVAHK       | NP (265-273)      | A3                     |
| FLU          | KTGGPIYKR       | NP (91-99)        | A68                    |
| FLU          | ELRSRYWAI       | NP (380-388)      | B8                     |
| FLU          | SRYWAIRTR       | NP (383-391)      | B27                    |
