# Supplementary material
Source: PubMed Central journal article supplement (PMC2042190)

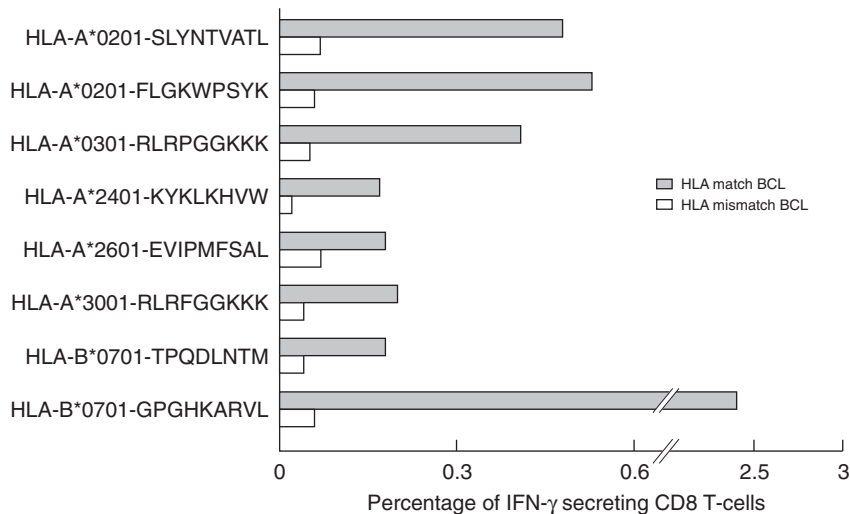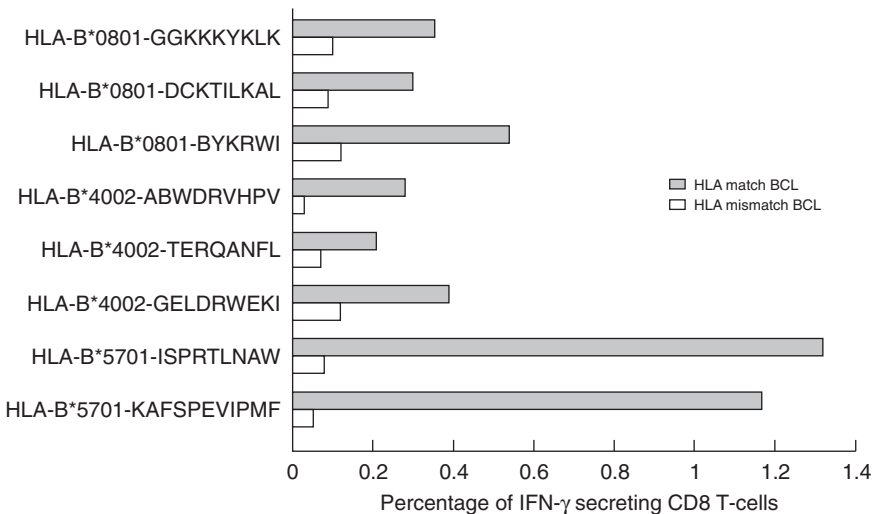

Supplement: pnas_0707570104_1.pdf [file pnas_0707570104_1.pdf]
